# Supplementary material for: Yield, Chemical Composition and Bioactivity of Essential Oils from Common Juniper (Juniperus communis L.) from Different Spanish Origins
Source: MDPI journal article supplement (doi:10.3390/molecules28114448), 2023-05-30
Supplement: s1 [file s1]

Table S1- Chemical composition of *Juniperus communis* essential oils obtained from 4 different locations.

| N° | RT<br>(min) | Compound              | LRI <sup>a</sup> | LRI <sup>b</sup> | Relative % <sup>c</sup> |                  |             |                   |                 |                  |                  |                  |
|----|-------------|-----------------------|------------------|------------------|-------------------------|------------------|-------------|-------------------|-----------------|------------------|------------------|------------------|
|    |             |                       |                  |                  | Location 1              |                  | Location 2  |                   | Location 3      |                  | Location 4       |                  |
|    |             |                       |                  |                  | Female                  | Male             | Female      | Male              | Female          | Male             | Female           | Male             |
|    |             |                       |                  |                  | L1F                     | L1M              | L2F         | L2M               | L3F             | L3M              | L4F              | L4M              |
| 1  | 13.374      | tricyclene            | 916              | 921              | 0.085±0.001             | 0.11±0.01        | 0.06±0.01   | 0.055±0.003       | 0.06±0.01       | 0.098±0.005      | 0.06±0.01        | 0.06±0.01        |
| 2  | 13.696      | alpha-thujene         | 922              | 924              | 0.87±0.02               | 0.42±0.01        | 0.07±0.01   | 0.048±0.001       | 0.496±0.003     | 0.3±0.01         | 2.5±0.1          | 2.76±0.04        |
| 3  | 14.060      | alpha-pinene          | 929              | 932              | <b>21.09±0.43</b>       | <b>24.1±0.6</b>  | <b>14±1</b> | <b>14.4±0.4</b>   | <b>16.5±0.9</b> | <b>21.3±1.3</b>  | <b>16.1±0.1</b>  | <b>16.8±0.5</b>  |
| 4  | 14.695      | alfa-fenchene         | 941              | 945              | 0.033±0.002             | 0.059±0.003      | 0.059±0.005 | 0.0038±0.003      | 0.06±0.01       | 0.07±0.01        | 0.029±0.003      | 0.05±0.01        |
| 5  | 14.742      | camphene              | 942              | 946              | 0.19±0.01               | 0.2083±0         | 0.179±0.004 | 0.16±0.02         | 0.21±0.02       | 0.35±0.001       | 0.15±0.02        | 0.15±0.01        |
| 6  | 15.055      | thuja-2.4(10)-diene   | 948              | 953              | 0.06±0.01               | 0.126±0.001      | 0.043±0.004 | 0.0330±0.0004     | 0.063±0.002     | 0.064±0.007      | 0.028±0.002      | 0.05±0.01        |
| 7  | 16.083      | sabinene              | 968              | 969              | <b>10±0.18</b>          | <b>4.57±0.05</b> | 0.97±0.07   | 0.58±0.02         | <b>4.9±0.1</b>  | 2.64±0.02        | <b>20±0.2</b>    | <b>20.9±0.7</b>  |
| 8  | 16.210      | beta-pinene           | 970              | 974              | 1.631±0.002             | 1.703±0.002      | 1.6±0.1     | 1.71±0.01         | 2.11±0.07       | 2.1±0.04         | 1.4±0.01         | 1.5±0.01         |
| 9  | 17.070      | beta-myrcene          | 987              | 988              | <b>5.26±0.05</b>        | 2.83±0.01        | 3.8±0.2     | 4.13±0.03         | 3.051±0.002     | <b>3.88±0.01</b> | <b>6.29±0.04</b> | <b>3.95±0.01</b> |
| 10 | 17.497      | δ-2-carene            | 995              | 1001             | 0.26±0.01               | 0.3±0.01         | 0.52±0.03   | 0.45±0.01         | 0.29±0.01       | 0.35±0.01        | 0.07±0.01        | 0.151±0.002      |
| 11 | 17.687      | alpha-phellandrene    | 999              | 1002             | 1.486±0.005             | 1.49±0.01        | 2.4±0.1     | 2.66±0.03         | 1.987±0.0002    | 2.38±0.01        | 0.36±0.02        | 0.61±0.02        |
| 12 | 17.988      | δ-3-carene            | 1004             | 1008             | 0.3±0.01                | 0.451±0.009      | 0.72±0.04   | 0.383±0.009       | 0.7979±0.0004   | 0.841±0.009      | 0.316±0.004      | 0.66±0.01        |
| 13 | 18.335      | alpha-terpinene       | 1011             | 1014             | 0.672±0.002             | 0.39±0.01        | 0.13±0.01   | 0.07±0.01         | 0.46±0.01       | 0.22±0.01        | 0.91±0.02        | 1.11±0.02        |
| 14 | 18.762      | p-cymene              | 1019             | 1020             | 1.44±0.01               | 1.498±0.002      | 1.5±0.1     | 1.58±0.03         | 2.191±0.001     | 1.96±0.03        | 0.69±0.03        | 1±0.02           |
| 15 | 19.087      | limonene              | 1024             | 1024             | <b>20.74±0.26</b>       | <b>15.1±0.1</b>  | <b>25±1</b> | <b>19.64±0.02</b> | <b>20.2±0.3</b> | <b>19.5±0.3</b>  | 5.94±0.03        | <b>7.3±0.08</b>  |
| 16 | 19.505      | cis-beta-ocimene      | 1033             | 1032             | -                       | 0.016±0.001      | 0.019±0.001 | 0.016±0.002       | 0.012±0.001     | 0.032±0.005      | -                | 0.0051±0.0002    |
| 17 | 20.033      | trans-beta-ocimene    | 1043             | 1044             | 0.16±0.01               | 0.09±0.02        | 0.10±0.01   | 0.17±0.01         | 0.041±0.004     | 0.118±0.003      | 0.047±0.002      | 0.11±0.01        |
| 18 | 20.436      | isopentyl butanoate   | 1051             | 1052             | 0.101±0.004             | 0.061±0.003      | 0.147±0.007 | 0.150±0.004       | 0.013±0.002     | 0.18±0.02        | 0.0058±0.0004    | 0.0259±0.0004    |
| 19 | 20.545      | gamma-terpinene       | 1053             | 1054             | 1.19±0.08               | 0.66±0.02        | 0.16±0.02   | 0.095±0.002       | 0.74±0.02       | 0.35±0.03        | 1.63±0.01        | 1.96±0.02        |
| 20 | 20.963      | cis-sabinene hydrate  | 1061             | 1065             | 0.1109±0.0002           | 0.081±0.006      | 0.034±0.003 | 0.019±0.002       | 0.05±0.01       | 0.087±0.001      | 0.25±0.02        | 0.31±0.02        |
| 21 | 22.065      | alfa-terpinolene      | 1082             | 1086             | 1.42±0.03               | 1.04±0.03        | 1.09±0.05   | 0.85±0.05         | 1.11±0.06       | 0.96±0.06        | 1.57±0.01        | 1.7±0.03         |
| 22 | 22.674      | linalool              | 1095             | 1095             | 0.13±0.02               | 0.1±0.02         | 0.105±0.009 | 0.135±0.004       | 0.0629±0.0002   | 0.1±0.01         | 0.039±0.003      | 0.04±0.01        |
| 23 | 22.960      | isopentyl isovalerate | 1100             | 1103             | 0.05±0.01               | 0.1±0.02         | 0.043±0.004 | 0.016±0.001       | 0.03±0.01       | 0.07±0.01        | 0.02±0.004       | 0.038±0.005      |

|    |        |                        |      |      |                  |               |                |                  |                  |               |               |                  |
|----|--------|------------------------|------|------|------------------|---------------|----------------|------------------|------------------|---------------|---------------|------------------|
| 24 | 23.720 | cis- p-menth-2-en-1-ol | 1115 | 1118 | 0.129±0.001      | 0.12±0.02     | 0.1142±0.0002  | 0.11±0.01        | 0.13±0.01        | 0.1±0.006     | 0.077±0.004   | 0.088±0.005      |
| 25 | 23.950 | alpha-campholenal      | 1120 | 1122 | 0.19±0.01        | 0.3±0.01      | 0.132±0.009    | 0.098±0.001      | 0.18±0.02        | 0.252±0.003   | 0.081±0.003   | 0.119±0.003      |
| 26 | 24.585 | trans-pinocarveol      | 1132 | 1135 | 0.255±0.001      | 0.33±0.02     | 0.184±0.006    | 0.155±0.002      | 0.201±0.007      | 0.25±0.01     | 0.0846±0.0002 | 0.108±0.004      |
| 27 | 24.906 | cis-verbenol           | 1139 | 1137 | 0.12±0.01        | 0.23±0.01     | 0.08±0.01      | 0.076±0.001      | 0.12±0.002       | 0.52±0.02     | 0.051±0.004   | 0.084±0.004      |
| 28 | 25.673 | trans-pinocamphone     | 1154 | 1158 | 0.0084±0.0002    | 0.041±0.004   | 0.012±0.002    | 0.009±0.002      | 0.0134±0.0002    | 0.019±0.001   | -             | -                |
| 29 | 25.782 | pinocarvone            | 1156 | 1160 | 0.021±0.001      | 0.04±0.009    | 0.016±0.001    | 0.009±0.001      | 0.021±0.002      | 0.03±0.01     | -             | -                |
| 30 | 26.519 | terpinen-4-ol          | 1171 | 1174 | 1.76±0.02        | 1.18±0.05     | 0.31±0.03      | 0.163±0.003      | 0.82±0.06        | 0.45±0.03     | 1.5±0.03      | 1.7±0.03         |
| 31 | 27.177 | alpha-terpineol        | 1185 | 1186 | 0.181±0.001      | 0.2±0.04      | 0.39±0.02      | 0.57±0.05        | 0.26±0.05        | 0.31±0.02     | 0.054±0.004   | 0.075±0.003      |
| 32 | 27.428 | myrtenol               | 1190 | 1194 | 0.101±0.002      | 0.05±0.01     | 0.037±0.005    | 0.036±0.003      | 0.11±0.02        | 0.035±0.0001  | 0.014±0.002   | 0.058±0.001      |
| 33 | 27.445 | cis-piperitol          | 1190 | 1195 | 0.0185±0.0003    | 0.13±0.02     | 0.0696±0.0004  | 0.072±0.002      | 0.03±0.01        | 0.083±0.003   | 0.03±0.002    | 0.0076±0.0001    |
| 34 | 28.013 | trans-piperitol        | 1202 | 1207 | 0.046±0.002      | 0.088±0.007   | 0.037±0.004    | 0.03±0.01        | 0.051±0.005      | 0.05±0.01     | 0.023±0.002   | 0.034±0.005      |
| 35 | 28.551 | trans-carveol          | 1213 | 1215 | 0.09±0.01        | 0.0802±0.0005 | 0.09±0.01      | 0.053±0.001      | 0.08±0.01        | 0.05±0.01     | 0.026±0.001   | 0.025±0.002      |
| 36 | 28.977 | citronellol            | 1222 | 1223 | 0.0257±0.0002    | 0.148±0.003   | 0.30±0.01      | 0.29±0.01        | 0.06±0.01        | 0.07±0.01     | -             | -                |
| 37 | 29.063 | cis-carveol            | 1224 | 1226 | 0.028±0.002      | 0.07±0.01     | 0.0413±0.0005  | 0.06±0.01        | 0.023±0.005      | 0.0332±0.0004 | -             | -                |
| 38 | 30.188 | piperitone             | 1248 | 1249 | 0.04±0.01        | 0.046±0.008   | 0.047±0.004    | 0.043±0.003      | 0.053±0.007      | 0.041±0.007   | 0.0457±0.0002 | 0.08±0.01        |
| 39 | 30.490 | methyl citronellate    | 1254 | 1257 | 0.04±0.01        | 0.025±0.005   | 0.060±0.006    | 0.056±0.009      | 0.02±0.004       | 0.1±0.01      | 0.037±0.002   | -                |
| 40 | 31.168 | p-menth-1-en-7-al      | 1269 | 1273 | 0.018±0.004      | 0.021±0.001   | 0.080±0.003    | 0.082±0.003      | 0.11±0.01        | 0.06±0.01     | -             | -                |
| 41 | 31.694 | bornyl acetate         | 1280 | 1284 | 0.531±0.002      | 0.66±0.01     | 0.39±0.04      | 0.35±0.02        | 0.37±0.01        | 0.439±0.003   | 0.236±0.004   | 0.23±0.02        |
| 42 | 33.482 | myrtenyl acetate       | 1319 | 1324 | 0.12±0.01        | 0.076±0.003   | 0.147±0.001    | 0.16±0.01        | 0.115±0.008      | 0.081±0.001   | 0.028±0.003   | 0.03±0.01        |
| 43 | 34.007 | trans-carvyl acetate   | 1331 | 1339 | 0.0442±0.0004    | 0.031±0.004   | 0.044±0.004    | 0.061±0.005      | 0.034±0.004      | 0.038±0.009   | 0.035±0.008   | 0.034±0.004      |
| 44 | 34.605 | alpha-cubebene         | 1345 | 1345 | 0.66±0.05        | 4.02±0.05     | 1.17±0.08      | 3.87±0.08        | 3.04±0.004       | 0.93±0.05     | 1±0.01        | 1.32±0.06        |
| 45 | 35.782 | alpha-copaene          | 1372 | 1374 | 0.35±0.01        | 0.81±0.02     | 0.77±0.05      | 0.352±0.003      | 0.68±0.02        | 0.49±0.02     | 0.278±0.005   | 0.34±0.01        |
| 46 | 36.006 | geranyl acetate        | 1377 | 1379 |                  | 0.012±0.003   | 0.05±0.01      | 0.06±0.01        | 0.015±0.003      | 0.0094±0.0002 | 0.012±0.001   | 0.013±0.003      |
| 47 | 36.100 | myrtanyl acetate       | 1379 | 1385 | 0.04±0.01        | 0.019±0.005   | 0.08±0.01      | 0.07±0.01        | 0.042±0.004      | 0.037±0.002   | 0.025±0.004   | 0.026±0.001      |
| 48 | 36.185 | beta-bourbonene        | 1381 | 1387 | 0.061±0.002      | 0.066±0.006   | 0.14±0.02      | 0.12±0.02        | 0.07±0.01        | 0.073±0.004   | 0.068±0.003   | 0.06±0.01        |
| 49 | 36.395 | isolongifolene         | 1386 | 1389 |                  | 0.16±0.03     | 0.07±0.01      | 0.12±0.03        | 0.103±0.009      | 0.029±0.005   | 0.066±0.009   | 0.15±0.01        |
| 50 | 36.471 | beta-elemene           | 1387 | 1389 | 0.615±0.004      | 0.77±0.05     | 0.8±0.1        | 0.59±0.01        | 0.58±0.02        | 0.94±0.06     | 0.632±0.003   | 0.51±0.03        |
| 51 | 37.099 | longifolene            | 1401 | 1407 | 0.036±0.002      | 0.079±0.002   | 0.169±0.002    | 0.240±0.008      | 0.082±0.005      | 0.202±0.003   | 0.026±0.001   | 0.027±0.003      |
| 52 | 37.402 | α-cedrene              | 1409 | 1410 | 0.032±0.001      | 0.12±0.002    | 0.28±0.05      | 0.812±0.007      | 0.278±0.009      | 0.0932±0.0004 | 0.279±0.009   | 0.44±0.07        |
| 53 | 37.700 | beta-caryophyllene     | 1416 | 1417 | <b>5.46±0.13</b> | 3.7±0.1       | 3.4±0.2        | 1.79±0.03        | 2.3±0.08         | 2.81±0.04     | 4.02±0.02     | 1.67±0.01        |
| 54 | 38.199 | cis-thujopsene         | 1428 | 1429 | 1.12±0.03        | 2.68±0.06     | <b>4.6±0.2</b> | <b>6.01±0.03</b> | <b>5.31±0.08</b> | 2.42±0.07     | 5.54±0.04     | <b>8.93±0.07</b> |

|    |        |                       |      |      |             |                  |                |                  |                  |                  |                    |             |
|----|--------|-----------------------|------|------|-------------|------------------|----------------|------------------|------------------|------------------|--------------------|-------------|
| 55 | 39.126 | alpha- humulene       | 1450 | 1452 | 3.76±0.11   | 2.52±0.05        | 2.2±0.2        | 1.04±0.04        | 1.5±0.05         | 2.01±0.07        | 2.97±0.07          | 1.09±0.03   |
| 56 | 40.059 | gamma-muurolene       | 1472 | 1478 | 0.15±0.01   | 0.394±0.002      | 0.59±0.02      | 0.61±0.02        | 0.58±0.03        | 0.52±0.03        | 0.44±0.01          | 0.528±0.002 |
| 57 | 40.268 | germacrene d          | 1477 | 1484 | 3.77±0.08   | 2.8±0.1          | 4.0±0.2        | 2.686±0.001      | 3.51±0.09        | 3.47±0.09        | <b>5.7±0.09</b>    | 3.5±0.1     |
| 58 | 40.487 | beta-selinene         | 1483 | 1489 | 0.403±0.001 | 0.66±0.05        | 0.83±0.03      | 0.73±0.03        | 0.501±0.009      | 1.01±0.03        | 0.37±0.02          | 0.32±0.07   |
| 59 | 40.787 | muurola-4(14).5-diene | 1490 | 1493 | 0.064±0.001 | 0.34±0.005       | 0.48±0.03      | 0.81±0.07        | 0.64±0.02        | 0.17±0.04        | 0.48±0.04          | 0.6±0.1     |
| 60 | 40.854 | beta-cyclogermacrane  | 1492 | 1500 | 0.85±0.03   | 0.92±0.07        | 1.2457±0.0003  | 0.92±0.03        | 0.89±0.08        | 1.42±0.04        | 1.27±0.06          | 0.87±0.04   |
| 61 | 41.034 | alpha-muurolene       | 1496 | 1500 | 0.27±0.01   | 1.83±0.06        | 1.0±0.1        | 0.88±0.02        | 1.37±0.02        | 0.53±0.03        | 0.83±0.04          | 1.15±0.01   |
| 62 | 41.212 | α-chamigrene          | 1500 | 1503 | -           | -                | 0.21±0.03      | 0.32±0.03        | 0.16±0.03        | -                | 0.3±0.02           | 0.6±0.1     |
| 63 | 41.443 | beta-curcumene        | 1506 | 1514 | 0.15±0.01   | 0.14±0.01        | 0.415±0.002    | 0.32±0.01        | 0.04±0.01        | 0.05±0.01        | 0.11±0.02          | 0.142±0.001 |
| 64 | 41.627 | gamma-cadinene        | 1511 | 1513 | 1.95±0.05   | <b>5.78±0.16</b> | <b>6.0±0.2</b> | <b>9.5±0.1</b>   | 2.49±0.08        | <b>5.05±0.11</b> | 1.49±0.03          | 2.06±0.09   |
| 65 | 41.956 | delta-cadinene        | 1519 | 1522 | 1.72±0.05   | 2.36±0.13        | 2.3±0.1        | 1.69±0.05        | 2.77±0.04        | 1.72±0.04        | 1.91±0.03          | 2.58±0.07   |
| 66 | 42.465 | alpha.-cadinene       | 1532 | 1537 | 0.039±0.002 | 0.44±0.02        | 0.07±0.01      | 0.12±0.02        | 0.12±0.01        | 0.17±0.01        | 0.044±0.009        | 0.04±0.01   |
| 67 | 43.359 | germacrene b          | 1555 | 1559 | 3.85±0.11   | <b>4.64±0.28</b> | <b>4.4±0.3</b> | <b>4.93±0.09</b> | <b>4.19±0.08</b> | <b>4.31±0.17</b> | <b>5.981±0.009</b> | 2.42±0.02   |
| 68 | 43.435 | nerolidol <(e)->      | 1557 | 1561 | 0.05±0.01   | 0.17±0.04        | 0.4260±0.0005  | 0.056±0.004      | 0.24±0.06        | 0.84±0.07        | 0.031±0.006        | 0.02±0.01   |
| 69 | 44.058 | germacren d-4-ol      | 1572 | 1574 | 0.12±0.003  | 0.17±0.01        | 0.15±0.02      | 0.114±0.005      | 0.58±0.03        | 0.34±0.07        | 0.15±0.02          | 0.24±0.03   |
| 70 | 44.126 | spathulenol           | 1574 | 1577 | 0.105±0.002 | 0.048±0.004      | 0.33±0.05      | 0.290±0.005      | 0.51±0.02        | 0.5±0.01         | 0.214±0.003        | 0.202±0.005 |
| 71 | 44.357 | caryophyllene oxide   | 1580 | 1582 | 1.1±0.04    | 0.88±0.03        | 1.22±0.07      | 0.316±0.004      | 1.24±0.02        | 1.41±0.03        | 0.576±0.008        | 0.24±0.01   |
| 72 | 45.030 | widdrol               | 1597 | 1599 | -           | 0.1±0.02         | 0.193±0.009    | 0.039±0.005      | 0.17±0.01        | 0.18±0.01        | 0.1±0.01           | 0.22±0.05   |
| 73 | 45.087 | cedrol                | 1599 | 1600 | -           | 0.52±0.06        | 0.46±0.03      | 2.93±0.03        | 0.75±0.08        | 0.32±0.04        | 0.42±0.02          | 0.66±0.06   |
| 74 | 45.366 | humulene oxide ii     | 1606 | 1608 | 0.47±0.02   | 0.36±0.01        | 0.70±0.06      | 0.30±0.04        | 0.78±0.01        | 0.94±0.03        | 0.32±0.04          | 0.18±0.03   |
| 75 | 46.051 | epicubenol            | 1624 | 1627 | -           | 0.06±0.01        | 0.12±0.03      | 0.090±0.006      | 0.25±0.02        | 0.244±0.003      | 0.107±0.005        | 0.19±0.02   |
| 76 | 46.520 | tau-cadinol           | 1637 | 1638 | 0.18±0.03   | 0.492±0.003      | 1.4±0.2        | 2.40±0.01        | 1.26±0.03        | 1.8±0.1          | 0.41±0.02          | 0.6±0.01    |
| 77 | 47.027 | tau-muurolol          | 1650 | 1640 | 0.07±0.01   | 0.14±0.02        | 0.35±0.08      | 0.50±0.03        | 0.84±0.05        | 0.68±0.09        | 0.26±0.03          | 0.31±0.02   |
| 78 | 48.547 | eudesm-7(11)-en-4-ol  | 1690 | 1700 | 0.015±0.001 | 0.03±0.003       | 0.06±0.01      | 0.086±0.005      | 0.081±0.005      | 0.083±0.009      | 0.024±0.003        | 0.03±0.01   |
| 79 | 54.289 | levopimaradiene       | 2033 | 2039 | -           | -                | 0.08±0.01      | 0.0364±0.0008    | 0.042±0.002      | 0.022±0.001      | -                  | -           |
| 80 | 54.613 | abitatriene           | 2068 | 2058 | -           | 0.11±0.01        | 0.15±0.02      | 0.093±0.002      | 0.22±0.01        | 0.149±0.009      | 0.07±0.01          | 0.079±0.001 |
| 81 | 54.880 | abitadiene            | 2098 | 2088 | -           | -                | 0.22±0.03      | 0.1660±0.0001    | 0.3±0.01         | 0.152±0.002      | 0.053±0.006        | 0.07±0.01   |

<sup>a</sup> LRI. linear retention index determined on a DB-5 MS fused silica column relative to a series of n-alkanes (C8–C40). <sup>b</sup> linear retention index reported in the literature (Adams. 2017) [41]. <sup>c</sup> relative % is given as mean ± SD  
RT- Retention time

L1F- Female Sample from Location 1; L1M- Male Sample from Location 1; L2F- Female Sample from Location 2; L2M- Male Sample from Location 2; L3F- Female Sample from Location 3; L3M- Male Sample from Location 3; L4F- Female Sample from Location 4;  
L4M-Male Sample from Location 4.
